1 **Tobramycin suppresses cystic fibrosis lung inflammation by increasing 5' tRNA-fMet**  
2 **halves secreted by *P. aeruginosa***

3 Zhongyou Li<sup>1</sup>, Katja Koeppen<sup>1</sup>, Alix Ashare<sup>1,2</sup>, Deborah A. Hogan<sup>1</sup>, Scott A. Gerber<sup>3</sup>, and Bruce  
4 A. Stanton<sup>1\*</sup>

5 <sup>1</sup>Department of Microbiology and Immunology, Geisel School of Medicine at Dartmouth, Hanover,  
6 NH, USA

7 <sup>2</sup>Pulmonary and Critical Care Medicine, Dartmouth-Hitchcock Medical Center, Lebanon, NH,  
8 USA

9 <sup>3</sup>Norris Cotton Cancer Center, Geisel School of Medicine at Dartmouth, Lebanon, NH, USA

10

11 **Corresponding author:**

12 Bruce A. Stanton, Ph.D.

13 Department of Microbiology and Immunology

14 Geisel School of Medicine at Dartmouth

15 520 Renssen

16 Hanover NH 03755

17 Phone: 603-650-1775

18 Email: [Bruce.A.Stanton@dartmouth.edu](mailto:Bruce.A.Stanton@dartmouth.edu)

19 **Keywords:** cystic fibrosis, tobramycin, outer membrane vesicles, tRNA halves, anti-  
20 inflammatory

21 **The authors have declared that no conflict of interest exists.**

## 22 **Abstract**

23 Although inhaled tobramycin increases lung function in people with cystic fibrosis (pwCF), the  
24 density of *P. aeruginosa* in the lungs is only modestly reduced; hence, the mechanism whereby  
25 tobramycin improves lung function remains unclear. Previously, we demonstrated that *P.*  
26 *aeruginosa* secretes outer membrane vesicles (OMVs) that fuse with bronchial epithelial cells  
27 (HBECs), delivering small RNAs (sRNAs) that suppress the host immune response. Thus, we  
28 hypothesized that tobramycin modifies the sRNA content of OMVs leading to reduced  
29 inflammation and neutrophil-mediated lung damage. We found that tobramycin increased the  
30 amount of two 5' tRNA-fMet halves in OMVs (Tobi-OMVs) and that Tobi-OMVs elicited less IL-8  
31 secretion by CF-HBECs than control OMVs (ctrl-OMVs). A specific 5' tRNA-fMet halves inhibitor  
32 reduced the ability of Tobi-OMVs to suppress IL-8 secretion. Tobi-OMVs were also less  
33 effective in stimulating KC secretion and neutrophil recruitment in mouse lungs compared to ctrl-  
34 OMVs. Tobramycin also reduced IL-8 and neutrophil abundance in bronchoalveolar lavage fluid  
35 obtained from pwCF. The 5' tRNA-fMet halves reduced IL-8 secretion by an AGO2-mediated  
36 post-transcriptional regulatory mechanism. The clinical benefit of tobramycin is partly due to an  
37 increase in the secretion of 5' tRNA-fMet halves in OMVs, leading to the attenuation of IL-8 and  
38 neutrophil-mediated CF lung damage.

## 39 Introduction

40 Cystic fibrosis (CF) is a genetic disease caused by absent or aberrant function of the cystic  
41 fibrosis transmembrane conductance regulator (CFTR), which leads to airway periciliary  
42 dehydration, increased mucus viscosity, and decreased mucociliary clearance (1, 2). Insufficient  
43 mucociliary clearance causes persistent bacterial infection, non-resolving lung inflammation,  
44 and excessive neutrophil recruitment (3, 4). Chronic neutrophilic airway inflammation damages  
45 the lungs by continuous secretion of reactive oxygen species (ROS) and proteases, contributing  
46 to bronchiectasis and progressive CF lung function loss (5, 6). *Pseudomonas aeruginosa* is the  
47 most common pathogen identified in adult CF lungs, with 70-80% prevalence (3, 7), and *P.*  
48 *aeruginosa* respiratory infection correlates with CF lung disease severity and mortality (8, 9).  
49 Inhaled tobramycin is a commonly used antibiotic to suppress *P. aeruginosa* burden and to  
50 ameliorate lung function loss once chronic pulmonary colonization is established (7, 10).  
51 Tobramycin is an aminoglycoside antibiotic that acts by binding to 16S ribosomal RNA (rRNA)  
52 and perturbing bacterial protein synthesis (11). The long-term use of inhaled tobramycin  
53 significantly improves lung function and reduces mortality in CF patients (12, 13). Inhaled  
54 tobramycin is administered in intermittent repeated cycles of 28 days on the drug and 28 days  
55 off. In a double-blind, placebo-controlled study, lung function improved significantly after the first  
56 two weeks of treatment and correlated with a decrease of *P. aeruginosa* colony-forming units  
57 (CFUs) in sputum by more than 158-fold (14). Intriguingly, the magnitude of the reduction in  
58 bacterial CFUs was less than ten-fold in the third cycle of therapy, although lung function  
59 improvement was maintained at a comparable level (14). Furthermore, an open-label, follow-on  
60 trial with adolescent patients and 12 treatment cycles revealed that the reduction of *P.*  
61 *aeruginosa* CFUs in sputum only explained 11.7% of CF lung function improvement (15).  
62 Moreover, a more recent analysis of sputum revealed that tobramycin has no significant effect  
63 on *P. aeruginosa* abundance (16). Together, these data suggest that tobramycin improves CF

64 lung function by an unknown mechanism in addition to its bactericidal activity. The goal of this  
65 study is to elucidate this mechanism.

66 In the CF lungs, *P. aeruginosa* suppresses the host immune response by secreting outer  
67 membrane vesicles (OMVs), which fuse with host cells and deliver virulence factors, DNA, small  
68 RNAs, and transfer RNA (tRNA) fragments that mediate inter-kingdom host-pathogen  
69 interaction (17–20). OMVs are 50-300 nm lipopolysaccharide (LPS)-decorated vesicles secreted  
70 by all gram-negative bacteria (20, 21). Recently, we reported that *P. aeruginosa* secretes a 24-  
71 nt long sRNA in OMVs, which diffuse through the airway mucus layer and fuse with bronchial  
72 epithelial cells to transfer the sRNA (22). The sRNA down-regulates the OMV-induced secretion  
73 of IL-8, a potent neutrophil attractant, by base-pairing with target genes in airway epithelial cells,  
74 leading to attenuated recruitment of neutrophils into mouse lungs (22).

75 This study aimed to test the hypothesis that tobramycin prevents the decline in lung function of  
76 people with CF (pwCF) by increasing the level of anti-inflammatory sRNAs in OMVs secreted by  
77 *P. aeruginosa*. Here, we demonstrate that tobramycin increases the abundance of two 5' formyl-  
78 methionine tRNA (tRNA-fMet) halves in OMVs, and that the 5' tRNA-fMet halves are delivered  
79 into primary CF-HBECs by OMVs. 5' tRNA-fMet halves suppress IL-8 secretion by CF-HBECs  
80 and reduce KC (a murine homolog of IL-8) levels and neutrophil recruitment in mouse lungs by  
81 an AGO2-mediated post-transcriptional regulatory mechanism. This 5' tRNA-fMet halves-  
82 mediated reduction in lung neutrophils is predicted to mitigate lung damage. In pwCF, the IL-8  
83 concentration and neutrophil content in bronchoalveolar lavage fluid (BALF) was significantly  
84 reduced during the month of tobramycin administration compared to the month off tobramycin.  
85 Taken together, these data reveal that the clinical benefit of tobramycin is due in part to an  
86 increase in the secretion of 5' tRNA-fMet halves in OMVs, leading to attenuation of IL-8 and  
87 neutrophil-mediated CF lung damage.

## 88 **Results**

### 89 **Tobramycin reduces the ability of OMVs secreted by *P. aeruginosa* to stimulate IL-8** 90 **secretion by CF-HBECs.**

91 To test the hypothesis that tobramycin alters the virulence of OMVs secreted by *P. aeruginosa*,  
92 we designed an *in vitro* experiment depicted in Figure 1A. *P. aeruginosa* strain PA14 was grown  
93 in lysogeny broth (LB), and OMVs secreted by *P. aeruginosa* treated with vehicle (ctrl-OMVs) or  
94 tobramycin (Tobi-OMVs) were isolated as described in Methods. The concentration of  
95 tobramycin used (1 µg/mL) reduced growth by 33%, an amount similar to that observed in pwCF  
96 treated with tobramycin after three cycles of therapy (14) (Figure 1B). Tobramycin increased the  
97 secretion of OMVs by 38% compared to control (Figure 1C), which coincides with a previous  
98 report that antibiotics induce OMV production by *P. aeruginosa* (23).

99 To examine the effect of OMVs on the host immune response, polarized HBECs from CF  
100 donors (CF-HBECs) were grown in air-liquid interface (ALI) culture (24, 25) and exposed to the  
101 same number of ctrl-OMVs or Tobi-OMVs for 6 hours, whereupon IL-8 secretion was measured.  
102 Tobi-OMVs induced 36% less IL-8 secretion than ctrl-OMVs (Figure 1D). Similar results were  
103 obtained even when cells were exposed to 40% more Tobi-OMVs (1.4X Tobi-OMVs) than ctrl-  
104 OMVs to reflect the finding that tobramycin increased OMV production (Figure 1D). We  
105 measured other cytokines secreted by CF-HBECs (EGF, GRO, IL17a, and IP10) in response to  
106 ctrl-OMVs and Tobi-OMVs, but of these additional cytokines only IP-10 was significantly  
107 reduced by Tobi-OMVs compared to ctrl-OMVs (Supplemental Figure 1).

### 108 **Tobramycin increases the abundance of 5' tRNA-fMet halves in OMVs, and the tRNA** 109 **halves are transferred from OMVs to CF-HBECs**

110 To test the hypothesis that tobramycin increases the abundance of anti-inflammatory sRNAs in  
111 OMVs, we performed a small RNA-sequencing analysis to compare the sRNA content in ctrl-

112 OMVs and Tobi-OMVs. We identified 6145 unique sequences mapped to the PA14 genome,  
113 and 1064 were differentially enriched in Tobi-OMVs. The sequence length ranged from 20 to 48  
114 nucleotides; however, we excluded the 48-nt sequences from further analysis as they  
115 represented RNA species longer than the read length.

116 We focused on the most abundant and differentially induced sRNAs in Tobi-OMVs (Figure 2A  
117 and Table 1). We chose two 35-nt long sRNAs (#5 and #7 in Table 1) that were fragments of  
118 two initiator tRNAs (tRNA-fMet1 and tRNA-fMet2 located at PA14\_62790 and PA14\_52320,  
119 respectively) in PA14 for further analysis because they were bioinformatically predicted to  
120 suppress IL-8 secretion by CF-HBECs. The sequence reads in Tobi-OMVs mapped to these  
121 two loci had similar length distributions (Figure 2B and 2C; 80% of reads were 35-nt long),  
122 suggesting the tRNA-fMet fragments were not products of random degradation. The similar  
123 length distributions also imply common machinery for the biogenesis of these two tRNA  
124 fragments. Both have low minimum free energy, suggesting stable secondary structures.

125 The two 35-nt long tRNA-fMet fragments are 5' halves of tRNAs<sup>fMet</sup> (hereafter called 5' tRNA-  
126 fMet halves), which are products of cleavage in the anticodon loop (Figure 2D). Importantly, the  
127 two 5' tRNA-fMet halves have high sequence similarity with only one nucleotide difference,  
128 suggesting similar sequence-based targeting functions. The high sequence similarity allowed us  
129 to design qPCR primers to quantify both 5' tRNA-fMet halves simultaneously. By qPCR, we  
130 found that Tobi-OMVs secreted by PA14 and four clinical isolates (including two mucoid strains)  
131 also contained significantly more 5' tRNA-fMet halves than ctrl-OMVs (Figure 2E), indicating a  
132 strain-independent phenotype that extends to clinically relevant strains. Moreover, we  
133 reanalyzed our previously published small RNA-sequencing experiment (22), in which we  
134 sought to detect PA14 sRNAs transferred into non-CF HBECs after ctrl-OMVs exposure, and  
135 we were able to identify both 5' tRNA-fMet halves in OMV-exposed cells but not in the un-  
136 exposed group (Figure 2F).

137 Taken together, these observations demonstrate that the two 5' tRNA-fMet halves are the most  
138 abundant and most differentially induced sRNAs in Tobi-OMVs, have high sequence similarity,  
139 and are delivered to airway epithelial cells by OMVs; thus, they are good candidates for further  
140 investigation into their possible role in suppressing IL-8 secretion.

#### 141 **5' tRNA-fMet halves reduce IL-8 secretion**

142 To determine if 5' tRNA-fMet halves reduce IL-8 secretion, we transformed PA14 with an  
143 arabinose-inducible vector expressing 5' tRNA-fMet1 half (tRNA1-OMVs) or an empty vector  
144 control (V-OMVs). Small RNA-sequencing confirmed that the expression of 5' tRNA-fMet1 half  
145 in tRNA1-OMVs was significantly induced by 2.73 fold compared to V-OMVs (Supplemental  
146 Figure 2). Primary CF-HBECs were exposed to V-OMVs or tRNA1-OMVs, and the secretion of  
147 IL-8 was measured by ELISA. As predicted, tRNA1-OMVs induced less IL-8 secretion  
148 compared to the same amount of V-OMVs (Figure 3A). To provide additional support for the  
149 conclusion that 5' tRNA-fMet halves reduce IL-8 secretion by CF-HBECs, we designed an  
150 inhibitor, an RNA oligonucleotide with a complementary sequence to both 5' tRNA-fMet halves.  
151 CF-HBECs were transfected with the inhibitor or negative control inhibitor followed by exposure  
152 to ctrl-OMVs or 1.4X Tobi-OMVs. As predicted, the inhibitor reduced the ability of 1.4X Tobi-  
153 OMVs to suppress IL-8 secretion compared to ctrl-OMVs (Figure 3B).

154 Studies were conducted in mice to further support the conclusion that tobramycin reduces the  
155 pro-inflammatory effect of OMVs by increasing the 5' tRNA-fMet1 half content. Mice were  
156 exposed to the same number of V-OMVs or tRNA1-OMVs by oropharyngeal aspiration for 5  
157 hours, and BALF samples were harvested for analysis. The concentration of KC, a murine  
158 functional homolog of IL-8 (Figure 3C), and neutrophil content (Figure 3D) were significantly  
159 reduced in BALF obtained from mice exposed to tRNA1-OMVs compared to V-OMVs. Thus, 5'  
160 tRNA-fMet1 half reduced the pro-inflammatory response of CF-HBECs *in vitro* and in a mouse  
161 model of inflammation.

162 **Inhaled tobramycin has an anti-inflammatory effect in *P. aeruginosa*-infected CF lungs**

163 To determine if tobramycin reduces inflammation and neutrophil burden in CF lungs, we  
164 performed a retrospective analysis to assess whether the administration of inhaled tobramycin  
165 changes the inflammatory status in pwCF. BALF samples were collected from four CF patients  
166 chronically infected with *P. aeruginosa* during the month of inhaled tobramycin (On Tobi) and  
167 the month off tobramycin (Off Tobi). In BALF obtained On Tobi, average IL-8 levels were  
168 reduced by 48.5% (Figure 3E), and the number of neutrophils was decreased by 25.9% (Figure  
169 3F) compared to Off Tobi. This clinical observation is consistent with the *in vitro* and mouse  
170 experiments, suggesting that OMVs secreted by tobramycin-exposed *P. aeruginosa* are less  
171 pro-inflammatory than control OMVs.

172 **5' tRNA-fMet halves regulate gene expression by base-pairing with target genes in CF-**  
173 **HBECs using an AGO2-dependent mechanism.**

174 Although we and others have shown that prokaryotic sRNAs regulate eukaryotic gene  
175 expression in a sequence-specific manner (22, 26), the mechanism is unknown. We therefore  
176 conducted experiments to determine if *P. aeruginosa* 5' tRNA-fMet halves can utilize the  
177 eukaryotic Argonaute 2 (AGO2) dependent gene silencing complex to suppress IL-8 secretion.  
178 We designed a three-step approach to identify the RNA binding targets, followed by proteomic  
179 analysis to determine the effect of 5' tRNA-fMet halves on protein expression (Figure 4A).  
180 Ingenuity Pathway Analysis (IPA) (27) was performed at each step to identify significantly  
181 enriched and down-regulated pathways that are relevant to CF and predicted to decrease IL-8  
182 secretion (Table 2).

183 We first performed a miRanda microRNA (miRNA) target scan (28) to predict the human binding  
184 targets of 5' tRNA-fMet1 half. miRanda is an algorithm designed for RNA-RNA binding  
185 prediction considering sequence complementarity and binding free energy. Given the high



186 sequence similarity between the two sRNAs, we used the sequence of 5' tRNA-fMet1 half to  
187 scan the whole human transcriptome and adjusted the prediction for the gene expression profile  
188 of polarized HBE cells to identify a list of 1518 predicted targets, accounting for 8.4% of human  
189 coding genes. IPA identified several pro-inflammatory pathways in epithelial cells that are  
190 predicted to be down-regulated by 5' tRNA-fMet1 half, including integrin-linked kinase signaling  
191 (29–31), LPS-stimulated MAPK Signaling (22), and HIF1a signaling (32) (Table 2).

192 The target gene prediction and pathway analysis encouraged us to map transcriptome-wide  
193 interactions between 5' tRNA-fMet1 half and target mRNAs mediated by AGO2. Although tRNA  
194 fragments have been shown to regulate gene expression, to our knowledge, there is no direct  
195 evidence that tRNA halves or any small noncoding RNA secreted by a prokaryotic organism can  
196 suppress eukaryotic gene expression by interacting with the AGO2 gene silencing complex.  
197 Thus, to determine if 5' tRNA-fMet1 half interacts with eukaryotic mRNAs in the AGO2-  
198 containing complex, we utilized the enhanced crosslinking and immunoprecipitation (eCLIP)  
199 approach (33). Briefly, and as described in detail in methods, this approach involved  
200 transfection of 5' tRNA-fMet1 half into CF-HBECs, followed by ligation of 5' tRNA-fMet1 half and  
201 other small RNAs to target mRNAs yielding sRNA-mRNA chimeric fragments. Chimeric  
202 fragments immunoprecipitated with AGO2 were characterized with high-throughput sequencing  
203 (chimeric eCLIP) (Figure 4B), which provided an unprecedented resolution to identify sRNA-  
204 mRNA interactions. CF-HBECs were transfected with 5' tRNA-fMet1 half or negative control  
205 siRNA (siNC) and subjected to AGO2 chimeric eCLIP analysis. This analysis allowed us to  
206 profile transcriptome-wide AGO2 authentic binding sites mediated by 5' tRNA-fMet1 half and  
207 other miRNAs with a stringent cutoff (IP vs. input cluster log<sub>2</sub> fold enrichment  $\geq 3$  and *P* value  $\leq$   
208 0.001). Using these parameters, we identified 10947 AGO2 binding sites in 4454 genes. Within  
209 those authentic binding sites, we identified 629 chimeric reads containing at least 18-nt long  
210 subsequences of 5' tRNA-fMet1 half. Lengths of identified subsequences ranged from 18-nt to

211 the full size of 5' tRNA-fMet1 half, and alignment positions of subsequences were evenly  
212 distributed (Figure 4C). These findings suggest that the full length 5' tRNA-fMet1 half was  
213 loaded into the AGO2 complex for gene targeting without being pre-processed into a shorter  
214 sRNA, and the subsequences with different lengths identified in chimeric reads were products of  
215 RNA fragmentation, a key step in the eCLIP sequencing library preparation.

216 To deeply profile the target repertoire of 5' tRNA-fMet1 half mediated by AGO2, we designed a  
217 5' tRNA-fMet1 half specific primer, which anneals to most of the identified subsequence (Figure  
218 4C), for targeted sequencing (targeted chimeric eCLIP). The targeted chimeric eCLIP allowed  
219 us to sequence 5' tRNA-fMet1 half containing chimeric fragment at a much higher depth. We  
220 identified that 5' tRNA-fMet1 half targeted 5776 sites in 1945 genes, and those target sites were  
221 not found in the negative control (siNC) transfected cells. Interestingly, although miRNA-AGO2  
222 complexes usually target 3' untranslated regions (3' UTR), most 5' tRNA-fMet1 half-AGO2 target  
223 sites were in introns (Figure 4D). Furthermore, motif enrichment analysis in target sites revealed  
224 that nucleotides 16-28 from the 5'-end of 5' tRNA-fMet1 half (which do not include the only  
225 distinct nucleotide between the two 5' tRNA-fMet halves) could explain 77% of identified target  
226 sites (Figure 4E). The fact that the most popular binding motif does not contain the unique  
227 nucleotide differentiating the two 5' tRNA-fMet halves suggests that they have many common  
228 target genes. Moreover, we found that miRanda predicted the target genes identified by  
229 chimeric eCLIP significantly better than expected by chance (Fisher's exact test,  $P < 10^{-12}$ ),  
230 suggesting that bioinformatic target prediction methods based on base-pairing can reliably  
231 predict target genes. Also, IPA predicted that a similar set of pro-inflammatory and IL-8  
232 induction pathways were inhibited by down-regulating these target genes (Table 2).

233 Lastly, to identify proteins whose abundances were changed by 5' tRNA-fMet halves delivered  
234 by OMVs, we utilized OMVs secreted by the 5' tRNA-fMet1 half-overexpression and empty  
235 vector clones (Supplemental Figure 2). Primary CF-HBECs from three donors were exposed to

236 V-OMVs or tRNA1-OMVs for 6 hours before being subjected to proteomic analysis. 8343  
237 proteins were identified, and we selected the top 20% differentially expressed proteins by *P*  
238 value, yielding 943 down-regulated proteins (Figure 4F). The statistically enriched and down-  
239 regulated pathways identified by IPA overlapped with our previous analysis based on identified  
240 target genes (Table 2). These down-regulated pathways included downstream signaling of  
241 IL17A and IL-6, which are pro-inflammatory cytokines secreted by other cell types in CF lungs to  
242 induce IL-8 secretion by CF-HBECs (34–36). Considering the top 20% down-regulated proteins,  
243 IPA identified seven proteins that contributed to IL-8 expression and predicted the decrease of  
244 IL-8 secretion (Figure 4G). Among the seven significantly down-regulated proteins, MAPK10,  
245 IKBKG, and EP300 were the direct targets of 5' tRNA-fMet1 half identified with our targeted  
246 chimeric eCLIP experiment, suggesting targeting of a pro-inflammatory network involving MAPK  
247 and NFκB signaling.

248 In summary, our three-step approach demonstrated that 5' tRNA-fMet1 halves transferred from  
249 OMVs to CF-HBECs were loaded into the AGO2 complex to target specific genes via a base-  
250 pairing mechanism, thus mediating the Tobi-OMVs induced reduction in IL-8 secretion.

## 251 Discussion

252 The goal of this study was to determine how tobramycin improves clinical outcomes in pwCF  
253 without significantly reducing the abundance of *P. aeruginosa*. Our data reveal that tobramycin  
254 increases the concentration of 5' tRNA-fMet halves in OMVs secreted by *P. aeruginosa*, that the  
255 OMVs deliver 5' tRNA-fMet halves to CF-HBECs, and that the increased delivery of 5' tRNA-  
256 fMet halves to CF-HBECs suppresses IL-8 secretion by interacting with pro-inflammatory gene  
257 transcripts, including MAPK10, IKBKG, and EP300, in an AGO2-dependent mechanism. Both *in*  
258 *vitro* and *in vivo* experiments in mice are consistent with this conclusion. Moreover, our  
259 retrospective analysis of pwCF on and off tobramycin is consistent with our data in mice that  
260 tobramycin reduces IL-8 and the neutrophil content in BALF. The reduction in the neutrophil  
261 content in BALF is predicted to mitigate lung damage in the CF lungs since CF neutrophils are  
262 the source of significant lung damage in pwCF (Figure 5).

263 tRNA-derived fragments are a novel class of regulatory sRNAs in prokaryotes and eukaryotes  
264 (17, 37). tRNAs are the most abundant RNA species by the number of molecules, and  
265 fragments with different lengths have been reported in three domains of life. miRNA-sized (~25-  
266 nt long) tRNA fragments in mammalian cells have garnered attention as they have been found  
267 to associate with Argonaute (AGO) proteins to mediate gene silencing by base-pairing with  
268 target mRNAs (26, 38, 39). Recently, a report showed that in *Bradyrhizobium japonicum*, a 21-  
269 nt tRNA fragment utilizes host plant AGO1 to regulate host gene expression, a cross-kingdom  
270 symbiotic relationship between bacteria and plants (40). Here, we provide the first evidence that  
271 35-nt tRNA halves from a bacterial pathogen are transferred into eukaryotic host cells and  
272 interact with AGO2-containing protein complexes to suppress target mRNAs.

273 The production of tRNA halves by cleavage in the anticodon loop of mature tRNAs is conserved  
274 across all life domains in response to various stress conditions (41–43); however, the molecular  
275 mechanism by which prokaryotes sense the stress and cleave specific tRNAs, and the cell-

276 autonomous effects of tRNA halves induced by stress remain largely unknown. *Mycobacterium*  
277 *tuberculosis* maintains its persistence in host cells by cleaving several tRNAs in half with  
278 endonucleases VapCs and MazF-mt9 to reduce the level of translation (44, 45). *Escherichia coli*  
279 secretes colicin D, an anticodon ribonuclease (ACNase), to cleave tRNA-Arg of competing *E.*  
280 *coli* strains in half by recognizing the anticodon-loop sequence, and the cleaved tRNA-Arg  
281 blocks the ribosome A-site to disrupt translation (46, 47). Similar mechanisms have been  
282 identified in fungi to inhibit the cell growth of nonself competitors (48, 49). Together, these  
283 reports and our findings suggest that *P. aeruginosa*, in response to tobramycin exposure, up-  
284 regulates an unidentified ACNase that recognizes and cleaves the anticodon loop of tRNA-  
285 fMets, which are essential initiator tRNAs, to slow down cell growth and prevent cell death.

286 The interaction of *P. aeruginosa* 5' tRNA-fMet halves with CF-HBEC mRNAs by base-pairing is  
287 reminiscent of miRNA-mRNA interactions in mammalian cells. While canonical miRNAs use a  
288 seed region, typically nucleotides 2-7 of miRNAs, to base-pair with the 3' UTR of target mRNAs  
289 (50), we observed that tRNA-fMet halves used nucleotides 16-28 to bind introns and coding  
290 sequences of target genes. This finding suggests that more studies are needed to better  
291 understand the targeting role of tRNA fragments for more accurate target prediction. Given the  
292 high sequence similarity of tRNAs in prokaryotes (51), precise target predictions would help  
293 generalize experimental findings to other fragments or pathogens. For example, *Helicobacter*  
294 *pylori* secretes sR-2509025, a 31-nt 5' tRNA-fMet fragment, in OMVs that fuse with human  
295 gastric adenocarcinoma cells and sR-2509025 diminishes LPS-induced IL-8 secretion (52). Due  
296 to the high sequence similarity of tRNA-fMets from *P. aeruginosa* and *H. pylori* and the similar  
297 phenotype on regulating IL-8 secretion, sR-2509025 may interact with AGO2 in gastric epithelial  
298 cells to target the pro-inflammatory network identified in this study.

299 Numerous reports have demonstrated that a myriad of signaling pathways, including NF- $\kappa$ B and  
300 MAPK signaling pathways, induce IL-8 secretion (53–55). IKBKG, also known as NF- $\kappa$ B

301 essential modulator (NEMO), is critical for NF- $\kappa$ B pathway activation. Furthermore, EP300, also  
302 called P300, is a transcription co-factor required for NF- $\kappa$ B-dependent IL-8 induction (56, 57).  
303 Moreover, a study demonstrated that DNA damage leads to NF- $\kappa$ B activation followed by  
304 MAPK10-mediated IL-8 secretion (58). Indeed, the elevated DNA damage response correlates  
305 with the non-resolving neutrophilic inflammation in the CF airways (59, 60); hence, our findings  
306 revealing that 5' tRNA-fMet halves-AGO2 complex decrease IKBKG, EP300, and MAPK10  
307 protein expression and thereby reduce IL-8 secretion and neutrophil levels are consistent with  
308 the literature.

309 CFTR is a negative regulator of the pro-inflammatory response mediated by MAPK and NF- $\kappa$ B  
310 signaling. Studies have shown that impaired CFTR leads to overactivation of NF- $\kappa$ B signaling  
311 and enhanced secretion of IL-8 by epithelial cells (61, 62). Also, CFTR down-regulates thermal  
312 injury-induced MAPK/NF- $\kappa$ B signaling, a pathway that leads to IL-8 expression and pulmonary  
313 inflammation (63). Here, we demonstrate that 5' tRNA-fMet halves target a pro-inflammatory  
314 network involving the MAPK and NF- $\kappa$ B signaling pathways, which are intrinsically over-  
315 activated in CF, highlighting the importance of this network in pulmonary inflammation.

316 There are a few limitations of our study. First, we performed a retrospective analysis of BALF  
317 samples collected from pwCF on and off inhaled tobramycin; however, we could not collect  
318 BALF in consecutive months on and off tobramycin in the same individuals because of the  
319 invasive nature of the technique and IRB restrictions on research bronchoscopies at Dartmouth-  
320 Hitchcock Medical Center. Nevertheless, after adjusting the number of days between collection  
321 dates for each sample pair (range from 175 to 791 days; Supplemental Table 1), tobramycin-on  
322 BALF had significantly lower IL-8 concentration and fewer neutrophil counts than tobramycin-off  
323 BALF. Importantly, a similar observation was made for IL-8 in CF sputum samples collected in  
324 consecutive months from pwCF on and off tobramycin (64). Because studies have shown that  
325 IL-8 concentration in sputum is inversely correlated with pulmonary function (65, 66), we

326 conclude that inhaled tobramycin has an anti-inflammatory effect in *P. aeruginosa*-infected CF  
327 lungs, resulting in improved lung function. Second, since there are many other differences in the  
328 sRNA content and likely the virulence factor content of Tobo-OMVs compared to ctrl-OMVs, we  
329 cannot rule out the possibility that other factors may contribute to the difference in the immune  
330 response of CF-HBECs and mouse lungs to Tobo-OMVs versus ctrl-OMVs. Nevertheless, since  
331 the inhibitor to 5' tRNA-fMet halves transfected into CF-HBECs blocked the Tobo-OMVs  
332 mediated reduction in IL-8 secretion compared to ctrl-OMVs, we conclude that 5' tRNA-fMet  
333 halves play a major role in suppressing IL-8 levels and neutrophil recruitment.

334 Highly effective CFTR modulator drugs have significantly improved outcomes in pwCF;  
335 however, in a few recent studies, they have been shown to have either no effect or a modest  
336 effect on the number of *P. aeruginosa* in the CF lungs (10, 67). Thus, new approaches are  
337 needed to reduce the bacterial load in the lungs of chronically colonized pwCF. We propose that  
338 5' tRNA-fMet halves or similar miRNA-like molecules may be utilized as a therapeutic strategy to  
339 reduce IL-8 and neutrophil content in the lungs of pwCF, resulting in reduced lung damage and  
340 improved lung function.

## 341 **Methods**

342 ***P. aeruginosa* cultures.** *P. aeruginosa* (strain PA14) and clinical isolates were grown in  
343 lysogeny broth (LB, Thermo Fisher Scientific, Waltham, MA) liquid cultures at 37°C with shaking  
344 at 225 rpm. Tobramycin (1 µg/mL), a concentration that reduces *P. aeruginosa* by an amount  
345 similar to that observed clinically, or vehicle was added to the cultures. The clinical isolates, two  
346 mucoid and two non-mucoid strains, have been characterized previously (68, 69). In some  
347 experiments, 5' tRNA-fMet1 half (5'- CGCGGGGTGGAGCAGTCTGGTAGCTCGTCGGGCTC-  
348 3') was cloned into the arabinose-inducible expression vector pMQ70 (70) by cutting EcoRI and  
349 SmaI restriction sites. GenScript (GenScript USA Inc., Piscataway, NJ, USA) performed the  
350 cloning procedure. PA14 was transformed with the 5' tRNA-fMet1 half expression vector or  
351 empty vector via electroporation. *P. aeruginosa* strains with the arabinose-inducible vector and  
352 its derivatives were grown in LB with 133 mM L-arabinose (2% w/v) and 300 µg/ml carbenicillin  
353 (both from Sigma-Aldrich).

354 **Growth kinetics of *P. aeruginosa*.** *P. aeruginosa* overnight LB cultures were centrifuged,  
355 washed, and resuspended in fresh LB before measuring the optical density at 600 nm (OD600)  
356 to determine cell number. Bacteria were seeded at  $1 \times 10^5$  cells per 100 µl LB with or without  
357 tobramycin (1 µg/mL) in a transparent, flat bottom, 96-well plate covered with a lid. The plate  
358 was cultured in a plate reader at 37°C for 24 h. The reader was programmed to measure the  
359 OD600 every 10 minutes after shaking the plate for 5 seconds.

360 **Outer membrane vesicle preparation and quantification.** OMVs were isolated as described  
361 by us previously (22, 71). Briefly, *P. aeruginosa* overnight cultures were centrifuged for 1 h at  
362 2800 g and 4°C to pellet the bacteria. The supernatant was filtered twice through 0.45 µm PVDF  
363 membrane filters (Millipore, Billerica, MA, USA) to remove bacteria and concentrated with 30K  
364 Amicon filters (Millipore, Billerica, MA, USA) at 2800 g and 4°C to obtain ~200 µL concentrate.  
365 The concentrate was resuspended in OMV buffer (20 mM HEPES, 500 mM NaCl, pH 7.4) and



366 subjected to ultracentrifugation for 2 h at 200,000 g and 4°C to pellet OMVs. OMV pellets were  
367 re-suspended in 60% OptiPrep Density Gradient Medium (Sigma-Aldrich, Cat. # D1556) and  
368 layered with 40%, 35%, 30% and 20% OptiPrep diluted in OMV buffer. OMVs in OptiPrep layers  
369 were centrifuged for 16 h at 100,000 g and 4°C. 500 µl fractions were taken from the top of the  
370 gradient, with OMVs residing in fractions 2 and 3, corresponding to 25% OptiPrep. The purified  
371 OMVs were quantified by nanoparticle tracking analysis (NTA, NanoSight NS300, Malvern  
372 Panalytical Ltd, Malvern, UK) before exposure of CF-HBECs or mice to OMVs.

373 **CF-HBEC culture.** De-identified primary human bronchial epithelial cells from four CF donors  
374 (CF-HBECs, Phe508del homozygous) were obtained from Dr. Scott Randell (University of North  
375 Carolina, Chapel Hill, NC, USA) and cultured as described previously (72, 73). Briefly, cells  
376 were grown in BronchiaLife basal medium (Lifeline Cell Technology, Frederick, MD, USA)  
377 supplemented with the BronchiaLife B/T LifeFactors Kit (Lifeline) as well as 10,000 U/ml  
378 Penicillin and 10,000 µg/ml Streptomycin.

379 To polarize cells, CF-HBECs were seeded on polyester transwell permeable filters (#3405 for  
380 24-mm transwell or #3801 for 12-mm Snapwell; Corning, Corning, NY) coated with 50 µg/ml  
381 Collagen type IV (Sigma-Aldrich, St. Louis, MO). Air Liquid Interface (ALI) medium was added to  
382 both apical and basolateral sides for cell growth. Once a confluent monolayer was obtained, the  
383 apical medium was removed, and cells were cultured at an air-liquid interface and fed  
384 basolaterally every other day with ALI media for 3-4 weeks before cells were fully polarized for  
385 treatment (24).

386 **Exposure of cells to OMVs.** Polarized cells on 12-mm Snapwell filters were washed with PBS  
387 to remove excess mucus, and 2 mL of serum-free ALI medium was added to the basolateral  
388 side.  $1.5 \times 10^{10}$  purified OMVs or the same volume of Optiprep vehicle control in 200 µL serum-  
389 free ALI medium were applied to the apical side of cells.  $2.1 \times 10^{10}$  Tobi-OMVs (1.4X Tobi-OMVs)

390 were also used. After a six-hour exposure, the basolateral medium was collected for cytokine  
391 measurements.

392 **Cytokine measurements.** Cytokine secretion from primary CF-HBECs was measured with the  
393 Human IL-8/CXCL8 DuoSet ELISA (#DY208, R&D Systems, Minneapolis, MN). Several  
394 samples were also screened with MILLIPLEX MAP Human Cytokine/Chemokine 41-Plex  
395 cytokine assay (Millipore). Cytokines in mouse BALF were analyzed with the Mouse CXCL1/KC  
396 DuoSet ELISA (#DY453, R&D Systems, Minneapolis, MN).

397 **RNA isolation and small RNA-seq analysis.** PA14 was grown in T-broth (10 g tryptone and 5  
398 g NaCl in 1 L H<sub>2</sub>O) with or without tobramycin (1 µg/mL) to reduce small RNA reads from yeast  
399 present in LB medium. The culture supernatants were processed as mentioned above to obtain  
400 OMV pellets. The pellets were resuspended with OMV buffer and re-pelleted again by  
401 centrifugation at 200,000 g for 2 h at 4°C and lysed with Qiazol followed by RNA isolation with  
402 the miRNeasy kit (Qiagen) to obtain total RNA including the small RNA fraction. DNase-treated  
403 total RNA was used to prepare cDNA libraries with the SMARTer smRNA-Seq Kit (Takara Bio,  
404 Mountain View, CA). Libraries were sequenced as 50 bp single-end reads on an Illumina HiSeq  
405 sequencer. The first three nucleotides of all reads and the adapter sequences were trimmed  
406 using cutadapt (74) before sequence alignment.

407 To verify the overexpression of 5' tRNA-fMet1 half, PA14 clones with the 5' tRNA-fMet1 half  
408 expression plasmid or the empty pMQ70 vector were grown in LB (with L-arabinose and  
409 carbenicillin) for isolation of V-OMVs and tRNA1-OMVs. The OMV pellets were collected and  
410 processed as described above to isolate RNA. The QIAseq miRNA Library Kit (Qiagen) was  
411 used to prepare cDNA libraries, and 50 bp single-end sequencing was performed on an Illumina  
412 MiniSeq system.

413 Reads were aligned to the PA14 reference genome using CLC Genomics Workbench (CLC-  
414 Bio/Qiagen) with the following modifications from the standard parameters: a) the maximum  
415 number of mismatches = zero to eliminate unspecific alignment and b) the maximum number of  
416 hits for a read = 30 to capture all sRNAs aligned to the PA14 genome. Pileups of mapped reads  
417 and frequency tables for each unique sequence were exported for normalization and further  
418 analysis with the software package edgeR in the R environment (75, 76). The raw reads and the  
419 processed data of the small RNA-seq have been deposited in NCBI' s Gene Expression  
420 Omnibus (77) and are accessible through the GEO Series accession number GSE183895 and  
421 GSE183897.

422 **Detection of 5' tRNA-fMet halves by RT-PCR.** The induction of 5' tRNA-fMet halves by  
423 tobramycin in OMVs of different *P. aeruginosa* strains was detected by custom Taqman Small  
424 RNA Assay (#4398987, Thermo Fisher Scientific). According to the manufacturer' s instructions,  
425 cDNA was synthesized with the TaqMan MicroRNA Reverse Transcription Kit (#4366596,  
426 Thermo Fisher Scientific). PCR amplification and detection of 5' tRNA-fMet halves were  
427 performed using the TaqMan Universal PCR Master Mix (#4304437, Thermo Fisher Scientific)  
428 as well as custom primers and probe design to target both 5' tRNA-fMet halves specifically.

429 **5' tRNA-fMet1 half target prediction.** The miRanda microRNA target scanning algorithm  
430 (v3.3a) was used to predict human target genes of 5' tRNA-fMet1 half (28). The 5' tRNA-fMet1  
431 half sequence was scanned against human RNA sequences (annotations from GRCh38.p13  
432 assembly) with a minimum miRanda alignment score of 150 to generate a list of predicted  
433 target genes and the corresponding interaction minimum free energies. To account for the effect  
434 of gene expression on target prediction, for each predicted target the minimum free energy was  
435 multiplied by the gene expression level (log2CPM) in polarized HBECs identified in our previous  
436 publication (78) to obtain an energy-expression score. 1518 genes (8.4% of all human genes)

437 with energy-expression scores small than -200 were defined as predicted targets for the  
438 Ingenuity Pathway Analysis (27).

#### 439 **Transfection of CF-HBECs with 5' tRNA-fMet1 half and chimeric eCLIP analysis**

440 CF-HBECs were seeded on 15 cm dishes coated with PureCol Bovine Collagen Solution  
441 (Advanced BioMatrix, Carlsbad, CA, USA) at  $2.7 \times 10^6$  cells per dish. Three days after seeding  
442 (at 80% confluence), cells were washed and fed with complete Lifeline medium with antibiotics  
443 and transfected with 100 nM 5' tRNA-fMet1 half (#10620310, Invitrogen custom siRNA, Thermo  
444 Fisher Scientific) or 100 nM AllStars Negative Control siRNA (siNC) using HiPerFect  
445 transfection reagent (both from Qiagen). One day after transfection, cells were washed and  
446 covered with room temperature PBS before UV irradiation (254 nm, 400 mJ/cm<sup>2</sup>). The irradiated  
447 cells were partially digested with pre-warmed 37°C trypsin/EDTA followed by addition of cold  
448 soybean trypsin inhibitor solution to round up cells before collection with scrapers and  
449 centrifugation at 600 x g for 10 minutes at 4°C. Cell pellets were flash-frozen in liquid nitrogen  
450 and shipped to Eclipse BioInnovations for chimeric eCLIP (Eclipse BioInnovations, San Diego,  
451 CA).

452 The chimeric eCLIP experiment and initial data analysis were conducted by Eclipse  
453 BioInnovations (Eclipse BioInnovations, San Diego, CA) as previously described (33) with an  
454 additional ligation step to form chimeric RNA-RNA species before 3' RNA adapter ligation. In  
455 brief, cells were lysed and digested with RNase I. For each cell pellet, an input and an  
456 immunoprecipitated sample using an anti-AGO2 antibody (Eclipse BioInnovations, San Diego,  
457 CA) were generated for cDNA library preparation followed by paired-end 150 bp sequencing on  
458 a NovaSeq platform. Non-chimeric reads were mapped to the human genome (UCSC version  
459 GRCh38/hg38), AGO2 binding clusters were identified by CLIPper (79) in immunoprecipitated  
460 (IP) samples and normalized against the paired input sample to define significant peaks (log<sub>2</sub>  
461 fold change  $\geq 3$  of normalized reads and *P* value  $< 0.001$  determined by Fisher's exact test). 5'

462 tRNA-fMet1 half-containing chimeric reads with at least 18 nt subsequences of 5' tRNA-fMet1  
463 half were identified, and the subsequences were trimmed before mapping to the human  
464 genome.

465 For targeted chimeric eCLIP, a target-specific primer 5' GGGTGGAGCAGTCTGGTA and a  
466 sequencing adapter-specific primer were used to enrich 5' tRNA-fMet1 half-containing cDNA  
467 from the IP sample libraries before paired-end 150 bp sequencing on a NovaSeq platform. The  
468 primer sequence was trimmed from the 5' ends of reads, and the remainder of reads were  
469 analyzed as non-chimeric reads as described above. The significant peak regions were  
470 identified using the same cutoffs, and HOMER' s findMotifsGenome.pl program was used for  
471 motif enrichment analysis (80). The resulting list of target genes with significant peaks in the  
472 transcripts was used as input for Ingenuity Pathway Analysis. The raw reads and processed  
473 data of the eCLIP sequencing have been deposited in NCBI' s Gene Expression Omnibus  
474 (GSE183898).

475 **Proteomic analysis.** Primary CF-HBECs were polarized on 24 mm transwell filters and washed  
476 with PBS before treatment. 2 mL serum-free ALI medium was added to the basolateral side.  
477  $2.8 \times 10^{10}$  purified V-OMVs or tRNA1-OMVs in 800  $\mu$ L serum-free ALI medium were applied to  
478 the apical side of cells. After a six-hour exposure, the cells were washed with PBS and  
479 detached from the transwells with pre-warmed 37°C trypsin/EDTA. Cells were pelleted and  
480 flash-frozen in liquid nitrogen for proteomic analysis.

481 The cell pellets were lysed in 8M urea/50mM Tris pH 8.1/100mM NaCl + protease inhibitors  
482 (Roche) and quantified by BCA assay (Pierce), followed by trypsin digestion and desalting. 40  
483 micrograms of peptides from each pellet were labeled with unique TMT reagent isobars; the  
484 individual TMT-labeled samples were then combined and fractionated offline into 12 fractions by  
485 PFP-RP-LC (81), followed by analysis on a UPLC-Orbitrap Fusion Lumos tribrid instrument in  
486 SPS-MS3 mode (82). The resulting tandem mass spectra were data-searched using Comet;

487 TMT reporter ion intensities were summed for each protein and normalized for total intensity  
488 across all channels. Mean fold changes comparing tRNA1-OMV-exposed cells with V-OMVs-  
489 exposed cells were calculated for each protein detected in all samples. Proteins were ranked by  
490 paired t-test *P* value, and network analysis of the top 20% proteins was performed with  
491 Ingenuity Pathway Analysis.

492 **Transfection of CF-HBECs with 5' tRNA-fMet halves inhibitor and OMV exposure.** CF-  
493 HBECs were seeded on PureCol-coated 12-well plates (Corning Inc.) at 50,000 cells per well.  
494 Two days after seeding (~80% confluence), cells were washed and fed with the complete  
495 Lifeline medium plus antibiotics and transfected with 50 nM custom mirVana miRNA inhibitor  
496 (inhibitor sequence: 5'- GAGCCCGACGAGCUACCAGACUGCUCCA-3', #4464086, Thermo  
497 Fisher Scientific) or 50 nM mirVanna inhibitor negative control#1 (#4464077, Thermo Fisher  
498 Scientific) using HiPerFect transfection reagent (Qiagen). 6 hours after transfection, cells were  
499 exposed to Optiprep vehicle ctrl, ctrl-OMVs ( $0.4 \times 10^{10}$  per well), 1.4X Tobi-OMVs ( $0.55 \times 10^{10}$  per  
500 well) for another 6 h, and the supernatants were collected for cytokine measurements.

#### 501 **Mouse exposure to OMVs**

502 8–9 weeks old male and female C57BL/6J mice (The Jackson Laboratory, Bar Harbor, ME,  
503 USA) were inoculated by oropharyngeal aspiration with OMVs ( $0.5 \times 10^{10}$  OMVs per mouse) or  
504 vehicle following brief anesthesia with isoflurane. OMV concentrations were adjusted with PBS  
505 to obtain 50  $\mu$ l inoculation volume. 5 h after exposure, mice were euthanized using isoflurane  
506 anesthesia, followed by cervical dislocation after breathing stops. Mice trachea were surgically  
507 exposed, and a catheter tube was inserted into the trachea and stabilized with sutures (#100–  
508 5000, Henry Schein Inc., Melville, NY, USA). The catheter was prepared by fitting a 23 gauge  
509 needle (BD #305145, Becton, Dickinson and Company, Franklin Lakes, NJ, USA) into  
510 transparent plastic tubing (BD #427411). BALF was collected by pumping 1 ml of sterile PBS

511 into the lungs and recovered with a syringe (BD #309659). This process was repeated once to  
512 collect 2 mL of BALF.

513 **Human subjects and bronchoscopy.** CF subjects (Phe508del homozygous) prescribed with  
514 an inhaled tobramycin regimen were enrolled if they had an FEV1 > 50% predicted, and were  
515 not currently having an exacerbation. Following informed consent, local anesthesia with  
516 nebulized lidocaine was administered to the posterior pharynx. Under conscious sedation, a  
517 flexible fiberoptic bronchoscopy was performed transorally. BALF was obtained from tertiary  
518 airways. After the bronchoscopy procedure, CF subjects were monitored per institutional  
519 protocol until they were stable for discharge.

520 **Quantification of neutrophils in BALF.** Cells in BALF samples were pelleted and  
521 resuspended in 100  $\mu$ L RBC lysis buffer (Promega) for 1 min. After removing red blood cells, the  
522 total number of cells in each BALF sample was counted, and concentrations were adjusted.  
523  $2 \times 10^5$  cells per sample were spun onto glass slides, air-dried, and stained with the Differential  
524 Quik Stain Kit (Polysciences, Warrington, PA) according to the manufacturer's protocol.  
525 Neutrophils were counted under 100x magnification using a microscope. The neutrophil  
526 concentration of BALF was calculated by accounting for the retrieved BALF volume and the  
527 dilution factors used to adjust the cell concentration.

528 **Statistics.** Data were analyzed using the R software environment for statistical computing and  
529 graphics version 4.1.0 (75) and Ingenuity Pathway Analysis (27). Statistical significance was  
530 calculated using a mixed effect linear model, Wilcoxon rank-sum tests, paired t-tests, and  
531 likelihood ratio tests on gene-wise negative binomial generalized linear models, as indicated in  
532 the figure legends. Data were visualized, and figures were created using the R package ggplot2  
533 (83).

534 **Study approval.** All animal experiments were approved by the Dartmouth Institutional Animal  
535 Care and Use Committee (Protocol No. 00002026). All CF subjects were enrolled in a protocol  
536 approved by the Dartmouth Hitchcock Institutional Review Board (Protocol No. 22781).



537 **Author contributions**

538 ZL, KK, AA, DAH, SAG, and BAS designed the research studies. ZL and KK conducted  
539 experiments, acquired data, and analyzed data. AA recruited human subjects, collected clinical  
540 samples and data for analysis. SAG performed the proteomic experiment. ZL prepared figures.  
541 ZL, KK, AA, DAH, SAG, and BAS wrote the manuscript. All authors contributed to the article and  
542 approved the submitted version.

543 **Acknowledgments**

544 This work was supported by the Cystic Fibrosis Foundation (STANTO19G0, STANTO20PO,  
545 STANTO19R0, and HOGAN19G0), the NIH (P30-DK117469, R01HL151385, P20-GM113132,  
546 S10OD016262), and NCCC Cancer Center Core Grants (5P30 CA023108-41, P30CA023108).  
547 We thank Dr. Fred W. Kolling for advice and support on the RNA-seq experiments.

548 **Reference**

- 549 1. Stanton BA. Effects of *Pseudomonas aeruginosa* CFTR chloride secretion and the host  
550 immune response. *Am J Physiol Cell Physiol* 2017;312(4):C357–C366.
- 551 2. Stoltz DA, Meyerholz DK, Welsh MJ. Origins of Cystic Fibrosis Lung Disease. *N Engl J Med*  
552 2015;372(4):351–362.
- 553 3. Hauser AR, Jain M, Bar-Meir M, McColley SA. Clinical Significance of Microbial Infection and  
554 Adaptation in Cystic Fibrosis. *Clin Microbiol Rev* 2011;24(1):29–70.
- 555 4. Lin CK, Kazmierczak BI. Inflammation: A Double-Edged Sword in the Response to  
556 *Pseudomonas aeruginosa* Infection. *JIN* 2017;9(3):250–261.
- 557 5. Roesch EA, Nichols DP, Chmiel JF. Inflammation in cystic fibrosis: An update. *Pediatric*  
558 *Pulmonology* 2018;53(S3):S30–S50.
- 559 6. Khan MA, Ali ZS, Swezey N, Grasemann H, Palaniyar N. Progression of Cystic Fibrosis  
560 Lung Disease from Childhood to Adulthood: Neutrophils, Neutrophil Extracellular Trap (NET)  
561 Formation, and NET Degradation. *Genes* 2019;10(3):183.
- 562 7. Cystic Fibrosis Foundation. Cystic Fibrosis Foundation Patient Registry 2019 Annual Data  
563 Report. *Cystic Fibrosis Foundation, Bethesda, MD*. 2020;92.
- 564 8. Emerson J, Rosenfeld M, McNamara S, Ramsey B, Gibson RL. *Pseudomonas aeruginosa*  
565 and other predictors of mortality and morbidity in young children with cystic fibrosis. *Pediatric*  
566 *Pulmonology* 2002;34(2):91–100.
- 567 9. Robinson TE, Leung AN, Chen X, Moss RB, Emond MJ. Cystic fibrosis HRCT scores  
568 correlate strongly with *Pseudomonas* infection. *Pediatric Pulmonology* 2009;44(11):1107–1117.

- 569 10. Davies JC, Martin I. New anti-pseudomonal agents for cystic fibrosis- still needed in the era  
570 of small molecule CFTR modulators?. *Expert Opinion on Pharmacotherapy* 2018;19(12):1327–  
571 1336.
- 572 11. Kotra LP, Haddad J, Mobashery S. Aminoglycosides: Perspectives on Mechanisms of  
573 Action and Resistance and Strategies to Counter Resistance. *Antimicrob Agents Chemother*  
574 2000;44(12):3249–3256.
- 575 12. Sawicki GS et al. Reduced mortality in cystic fibrosis patients treated with tobramycin  
576 inhalation solution. *Pediatr Pulmonol* 2012;47(1):44–52.
- 577 13. Bowman CM. The long-term use of inhaled tobramycin in patients with cystic fibrosis.  
578 *Journal of Cystic Fibrosis* 2002;1:194–198.
- 579 14. Ramsey BW et al. Intermittent Administration of Inhaled Tobramycin in Patients with Cystic  
580 Fibrosis. *N Engl J Med* 1999;340(1):23–30.
- 581 15. Moss RB. Long-term Benefits of Inhaled Tobramycin in Adolescent Patients With Cystic  
582 Fibrosis. *Chest* 2002;121(1):55–63.
- 583 16. Nelson MT et al. Maintenance tobramycin primarily affects untargeted bacteria in the CF  
584 sputum microbiome. *Thorax* 2020;75(9):780–790.
- 585 17. Li Z, Stanton BA. Transfer RNA-Derived Fragments, the Underappreciated Regulatory Small  
586 RNAs in Microbial Pathogenesis. *Front. Microbiol.* 2021;12. doi:10.3389/fmicb.2021.687632
- 587 18. Kaparakis-Liaskos M, Ferrero RL. Immune modulation by bacterial outer membrane  
588 vesicles. *Nature Reviews Immunology* 2015;15(6):375–387.

- 589 19. Bomberger JM et al. Long-Distance Delivery of Bacterial Virulence Factors by  
590 *Pseudomonas aeruginosa* Outer Membrane Vesicles. *PLOS Pathogens* 2009;5(4):e1000382.
- 591 20. Coelho C, Casadevall A. Answers to naysayers regarding microbial extracellular vesicles.  
592 *Biochemical Society Transactions* 2019;47(4):1005–1012.
- 593 21. Jan AT. Outer Membrane Vesicles (OMVs) of Gram-negative Bacteria: A Perspective  
594 Update. *Front. Microbiol.* 2017;8. doi:10.3389/fmicb.2017.01053
- 595 22. Koeppen K et al. A Novel Mechanism of Host-Pathogen Interaction through sRNA in  
596 Bacterial Outer Membrane Vesicles. *PLOS Pathogens* 2016;12(6):e1005672.
- 597 23. MacDonald IA, Kuehn MJ. Stress-Induced Outer Membrane Vesicle Production by  
598 *Pseudomonas aeruginosa*. *Journal of Bacteriology* 2013;195(13):2971–2981.
- 599 24. Randell SH, Fulcher ML, O'Neal W, Olsen JC. Primary Epithelial Cell Models for Cystic  
600 Fibrosis Research. In: Amaral MD, Kunzelmann K eds. *Cystic Fibrosis: Diagnosis and*  
601 *Protocols, Volume II: Methods and Resources to Understand Cystic Fibrosis*. Totowa, NJ:  
602 Humana Press; 2011:285–310
- 603 25. Barnaby R, Koeppen K, Stanton BA. Cyclodextrins reduce the ability of *Pseudomonas*  
604 *aeruginosa* outer-membrane vesicles to reduce CFTR Cl<sup>-</sup> secretion. *American Journal of*  
605 *Physiology-Lung Cellular and Molecular Physiology* 2019;316(1):L206–L215.
- 606 26. Maute RL et al. tRNA-derived microRNA modulates proliferation and the DNA damage  
607 response and is down-regulated in B cell lymphoma. *PNAS* 2013;110(4):1404–1409.
- 608 27. Krämer A, Green J, Pollard J, Tugendreich S. Causal analysis approaches in Ingenuity  
609 Pathway Analysis. *Bioinformatics* 2014;30(4):523–530.

- 610 28. Enright AJ et al. MicroRNA targets in *Drosophila*. *Genome Biology* 2003;5(1):R1.
- 611 29. Eucker TP, Samuelson DR, Hunzicker-Dunn M, Konkel ME. The focal complex of epithelial  
612 cells provides a signalling platform for interleukin-8 induction in response to bacterial pathogens.  
613 *Cellular Microbiology* 2014;16(9):1441–1455.
- 614 30. Ahmed AU, Sarvestani ST, Gantier MP, Williams BRG, Hannigan GE. Integrin-linked Kinase  
615 Modulates Lipopolysaccharide- and *Helicobacter pylori*-induced Nuclear Factor  $\kappa$ B-activated  
616 Tumor Necrosis Factor- $\alpha$  Production via Regulation of p65 Serine 536 Phosphorylation. *Journal*  
617 *of Biological Chemistry* 2014;289(40):27776–27793.
- 618 31. Gravelle S et al. Up-regulation of integrin expression in lung adenocarcinoma cells caused  
619 by bacterial infection: in vitro study. *Innate Immun* 2010;16(1):14–26.
- 620 32. Cane G et al. HIF-1 $\alpha$  mediates the induction of IL-8 and VEGF expression on infection with  
621 Afa/Dr diffusely adhering *E. coli* and promotes EMT-like behaviour. *Cellular Microbiology*  
622 2010;12(5):640–653.
- 623 33. Van Nostrand EL et al. Robust transcriptome-wide discovery of RNA binding protein binding  
624 sites with enhanced CLIP (eCLIP). *Nat Methods* 2016;13(6):508–514.
- 625 34. McAllister F et al. Role of IL-17A, IL-17F, and the IL-17 Receptor in Regulating Growth-  
626 Related Oncogene- $\alpha$  and Granulocyte Colony-Stimulating Factor in Bronchial Epithelium:  
627 Implications for Airway Inflammation in Cystic Fibrosis. *J Immunol* 2005;175(1):404–412.
- 628 35. Courtney JM, Ennis M, Elborn JS. Cytokines and inflammatory mediators in cystic fibrosis.  
629 *Journal of Cystic Fibrosis* 2004;3(4):223–231.
- 630 36. Hsu D et al. Interleukin-17 Pathophysiology and Therapeutic Intervention in Cystic Fibrosis  
631 Lung Infection and Inflammation. *Infection and Immunity* 84(9):2410–2421.

- 632 37. Su Z, Wilson B, Kumar P, Dutta A. Noncanonical Roles of tRNAs: tRNA Fragments and  
633 Beyond. *Annual Review of Genetics* 2020;54(1):47–69.
- 634 38. Kumar P, Anaya J, Mudunuri SB, Dutta A. Meta-analysis of tRNA derived RNA fragments  
635 reveals that they are evolutionarily conserved and associate with AGO proteins to recognize  
636 specific RNA targets. *BMC Biology* 2014;12(1):78.
- 637 39. Kuscu C et al. tRNA fragments (tRFs) guide Ago to regulate gene expression post-  
638 transcriptionally in a Dicer-independent manner. *RNA* 2018;24(8):1093–1105.
- 639 40. Ren B, Wang X, Duan J, Ma J. Rhizobial tRNA-derived small RNAs are signal molecules  
640 regulating plant nodulation. *Science* 2019;365(6456):919–922.
- 641 41. Tao E-W, Cheng WY, Li W-L, Yu J, Gao Q-Y. tiRNAs: A novel class of small noncoding  
642 RNAs that helps cells respond to stressors and plays roles in cancer progression. *Journal of*  
643 *Cellular Physiology* 2020;235(2):683–690.
- 644 42. Fricker R et al. A tRNA half modulates translation as stress response in *Trypanosoma*  
645 *brucei*. *Nature Communications* 2019;10(1):118.
- 646 43. Thompson DM, Lu C, Green PJ, Parker R. tRNA cleavage is a conserved response to  
647 oxidative stress in eukaryotes. *RNA* 2008;14(10):2095–2103.
- 648 44. Winther K, Tree JJ, Tollervey D, Gerdes K. VapCs of *Mycobacterium tuberculosis* cleave  
649 RNAs essential for translation. *Nucleic Acids Research* 2016;44(20):9860–9871.
- 650 45. Schifano JM et al. tRNA is a new target for cleavage by a MazF toxin. *Nucleic Acids*  
651 *Research* 2016;44(3):1256–1270.

- 652 46. Tomita K, Ogawa T, Uozumi T, Watanabe K, Masaki H. A cytotoxic ribonuclease which  
653 specifically cleaves four isoaccepting arginine tRNAs at their anticodon loops. *PNAS*  
654 2000;97(15):8278–8283.
- 655 47. Ogawa T et al. Substrate recognition mechanism of tRNA-targeting ribonuclease, colicin D,  
656 and an insight into tRNA cleavage-mediated translation impairment. *RNA Biology* 2020;0(0):1–  
657 13.
- 658 48. Chakravarty AK, Smith P, Jalan R, Shuman S. Structure, Mechanism, and Specificity of a  
659 Eukaryal tRNA Restriction Enzyme Involved in Self-Nonself Discrimination. *Cell Reports*  
660 2014;7(2):339–347.
- 661 49. Lu J, Huang B, Esberg A, Johansson MJO, Byström AS. The *Kluyveromyces lactis*  $\gamma$ -toxin  
662 targets tRNA anticodons. *RNA* 2005;11(11):1648–1654.
- 663 50. Chipman LB, Pasquinelli AE. miRNA Targeting: Growing beyond the Seed. *Trends in*  
664 *Genetics* 2019;35(3):215–222.
- 665 51. Saks ME, Conery JS. Anticodon-dependent conservation of bacterial tRNA gene  
666 sequences. *RNA* 2007;13(5):651–660.
- 667 52. Zhang H et al. sncRNAs packaged by *Helicobacter pylori* outer membrane vesicles  
668 attenuate IL-8 secretion in human cells. *International Journal of Medical Microbiology*  
669 2020;310(1):151356.
- 670 53. Lee J et al. Outer Membrane Vesicles Derived From *Escherichia coli* Regulate Neutrophil  
671 Migration by Induction of Endothelial IL-8. *Front Microbiol* 2018;9:2268.

- 672 54. Li J et al. Regulation of human airway epithelial cell IL-8 expression by MAP kinases.  
673 *American Journal of Physiology-Lung Cellular and Molecular Physiology* 2002;283(4):L690–  
674 L699.
- 675 55. Jundi K, Greene CM. Transcription of Interleukin-8: How Altered Regulation Can Affect  
676 Cystic Fibrosis Lung Disease. *Biomolecules* 2015;5(3):1386–1398.
- 677 56. Berghe WV, Bosscher KD, Boone E, Plaisance S, Haegeman G. The Nuclear Factor- $\kappa$ B  
678 Engages CBP/p300 and Histone Acetyltransferase Activity for Transcriptional Activation of the  
679 Interleukin-6 Gene Promoter. *Journal of Biological Chemistry* 1999;274(45):32091–32098.
- 680 57. Huang Z-W, Lien G-S, Lin C-H, Jiang C-P, Chen B-C. p300 and C/EBP $\beta$ -regulated IKK $\beta$   
681 expression are involved in thrombin-induced IL-8/CXCL8 expression in human lung epithelial  
682 cells. *Pharmacological Research* 2017;121:33–41.
- 683 58. Biton S, Ashkenazi A. NEMO and RIP1 Control Cell Fate in Response to Extensive DNA  
684 Damage via TNF- $\alpha$  Feedforward Signaling. *Cell* 2011;145(1):92–103.
- 685 59. Brown RK, McBurney A, Lunec J, Kelly FJ. Oxidative damage to DNA in patients with cystic  
686 fibrosis. *Free Radical Biology and Medicine* 1995;18(4):801–806.
- 687 60. Fischer BM et al. Increased expression of senescence markers in cystic fibrosis airways.  
688 *American Journal of Physiology-Lung Cellular and Molecular Physiology* 2013;304(6):L394–  
689 L400.
- 690 61. DiMango E, Ratner AJ, Bryan R, Tabibi S, Prince A. Activation of NF- $\kappa$ B by adherent  
691 *Pseudomonas aeruginosa* in normal and cystic fibrosis respiratory epithelial cells.. *J. Clin.*  
692 *Invest.* 1998;101(11):2598–2605.



- 693 62. Vij N, Mazur S, Zeitlin PL. CFTR Is a Negative Regulator of NF $\kappa$ B Mediated Innate Immune  
694 Response. *PLOS ONE* 2009;4(2):e4664.
- 695 63. Dong ZW et al. CFTR-regulated MAPK/NF- $\kappa$ B signaling in pulmonary inflammation in  
696 thermal inhalation injury. *Sci Rep* 2015;5. doi:10.1038/srep15946
- 697 64. Husson MO, Wizla-Derambure N, Turck D, Gosset P, Wallaert B. Effect of intermittent  
698 inhaled tobramycin on sputum cytokine profiles in cystic fibrosis. *Journal of Antimicrobial*  
699 *Chemotherapy* 2005;56(1):247–249.
- 700 65. Sagel SD et al. Induced sputum inflammatory measures correlate with lung function in  
701 children with cystic fibrosis. *The Journal of Pediatrics* 2002;141(6):811–817.
- 702 66. Sagel SD, Kapsner R, Osberg I, Sontag MK, Accurso FJ. Airway Inflammation in Children  
703 with Cystic Fibrosis and Healthy Children Assessed by Sputum Induction. *Am J Respir Crit Care*  
704 *Med* 2001;164(8):1425–1431.
- 705 67. Yi B, Dalpke AH, Boutin S. Changes in the Cystic Fibrosis Airway Microbiome in Response  
706 to CFTR Modulator Therapy. *Front. Cell. Infect. Microbiol.* 2021;11.  
707 doi:10.3389/fcimb.2021.548613
- 708 68. Yu Q et al. In vitro evaluation of tobramycin and aztreonam versus *Pseudomonas*  
709 *aeruginosa* biofilms on cystic fibrosis-derived human airway epithelial cells. *J Antimicrob*  
710 *Chemother* 2012;67(11):2673–2681.
- 711 69. Moreau-Marquis S, Coutermarsh B, Stanton BA. Combination of hypothiocyanite and  
712 lactoferrin (ALX-109) enhances the ability of tobramycin and aztreonam to eliminate  
713 *Pseudomonas aeruginosa* biofilms growing on cystic fibrosis airway epithelial cells. *J Antimicrob*  
714 *Chemother* 2015;70(1):160–166.

- 715 70. Shanks RMQ, Caiazza NC, Hinsa SM, Toutain CM, O' Toole GA. *Saccharomyces*  
716 *cerevisiae* -Based Molecular Tool Kit for Manipulation of Genes from Gram-Negative Bacteria.  
717 *Appl Environ Microbiol* 2006;72(7):5027–5036.
- 718 71. Bauman SJ, Kuehn MJ. Purification of outer membrane vesicles from *Pseudomonas*  
719 *aeruginosa* and their activation of an IL-8 response. *Microbes and Infection* 2006;8(9):2400–  
720 2408.
- 721 72. Fulcher ML, Randell SH. Human Nasal and Tracheo-Bronchial Respiratory Epithelial Cell  
722 Culture. In: Randell SH, Fulcher ML eds. *Epithelial Cell Culture Protocols: Second Edition*.  
723 Totowa, NJ: Humana Press; 2013:109–121
- 724 73. Koeppen K et al. CF monocyte-derived macrophages have an attenuated response to  
725 extracellular vesicles secreted by airway epithelial cells. *American Journal of Physiology-Lung*  
726 *Cellular and Molecular Physiology* 2021;320(4):L530–L544.
- 727 74. Martin M. Cutadapt removes adapter sequences from high-throughput sequencing reads.  
728 *EMBnet.journal* 2011;17(1):10–12.
- 729 75. R Core Team. *R: A Language and Environment for Statistical Computing*. Vienna, Austria: R  
730 Foundation for Statistical Computing; 2021:
- 731 76. Robinson MD, McCarthy DJ, Smyth GK. edgeR: a Bioconductor package for differential  
732 expression analysis of digital gene expression data. *Bioinformatics* 2010;26(1):139–140.
- 733 77. Barrett T et al. NCBI GEO: archive for functional genomics data sets--update. *Nucleic acids*  
734 *research* 2013;41(Database issue):D991-5.

- 735 78. Goodale BC, Rayack EJ, Stanton BA. Arsenic alters transcriptional responses to  
736 *Pseudomonas aeruginosa* infection and decreases antimicrobial defense of human airway  
737 epithelial cells. *Toxicol Appl Pharmacol* 2017;331:154–163.
- 738 79. Lovci MT et al. Rbfox proteins regulate alternative mRNA splicing through evolutionarily  
739 conserved RNA bridges. *Nat Struct Mol Biol* 2013;20(12):1434–1442.
- 740 80. Heinz S et al. Simple combinations of lineage-determining transcription factors prime cis-  
741 regulatory elements required for macrophage and B cell identities. *Mol Cell* 2010;38(4):576–  
742 589.
- 743 81. Grassetti AV, Hards R, Gerber SA. Offline pentafluorophenyl (PFP)-RP prefractionation as  
744 an alternative to high-pH RP for comprehensive LC-MS/MS proteomics and  
745 phosphoproteomics. *Anal Bioanal Chem* 2017;409(19):4615–4625.
- 746 82. McAlister GC et al. MultiNotch MS3 Enables Accurate, Sensitive, and Multiplexed Detection  
747 of Differential Expression across Cancer Cell Line Proteomes. *Anal. Chem.* 2014;86(14):7150–  
748 7158.
- 749 83. Wickham H. *ggplot2: Elegant Graphics for Data Analysis*. Springer-Verlag New York; 2016:
- 750 84. Gruber AR, Lorenz R, Bernhart SH, Neuböck R, Hofacker IL. The Vienna RNA Websuite.  
751 *Nucleic Acids Research* 2008;36(Web Server issue):W70–W74.

## 752 Figures

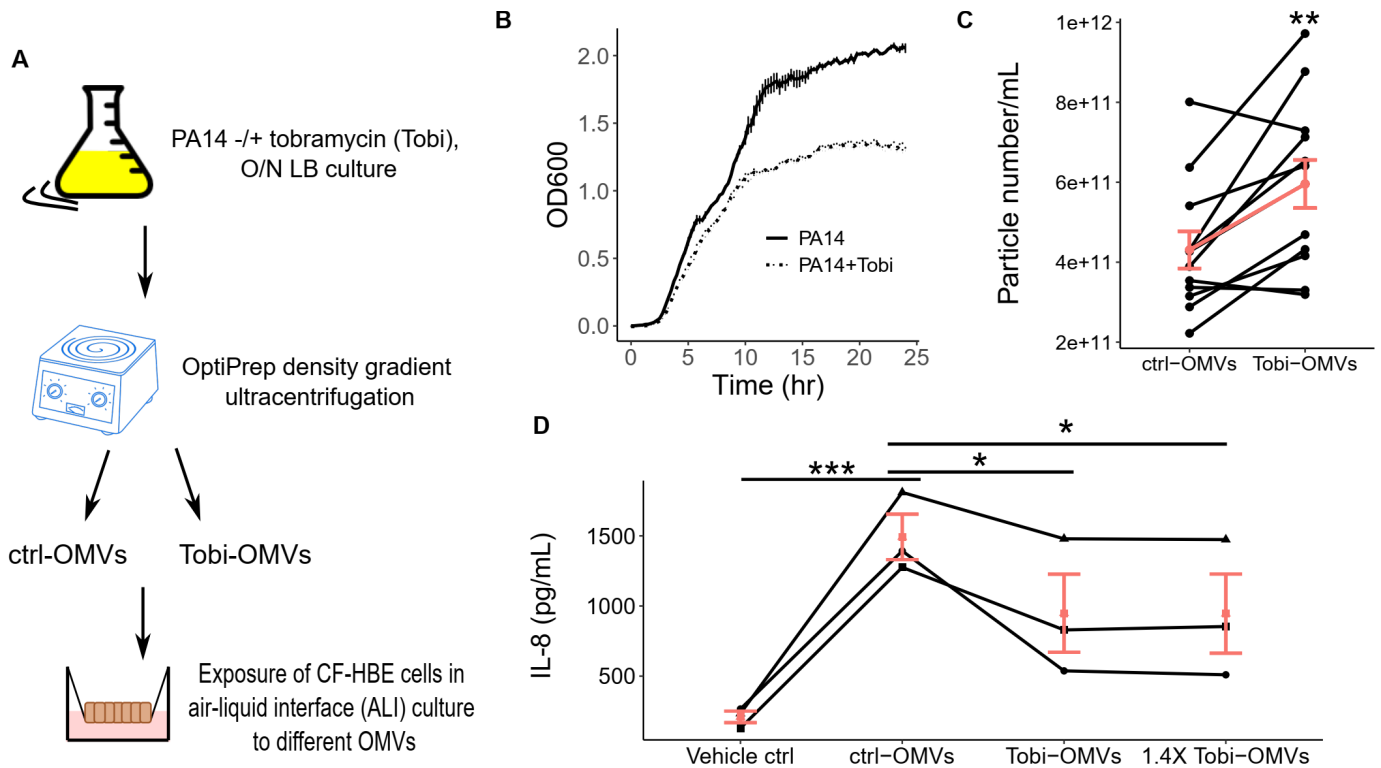

753 **Figure 1. Tobramycin reduces the ability of OMVs secreted by *P. aeruginosa* to stimulate**

754 **IL-8 secretion by CF-HBECs. (A)** A schematic diagram shows the experimental design. **(B)**

755 Growth curve (in microtiter plates) of PA14 in LB alone (PA14) or in LB with tobramycin (1

756  $\mu\text{g}/\text{mL}$ ; PA14+Tobi). Lines represent the averages from three biological replicates, and error

757 bars indicate standard error of means (SEM). The presence of tobramycin inhibited PA14

758 growth by 33% between the 13 to 20 hour time points. **(C)** OMV concentration of purified ctrl-

759 OMVs and Tobi-OMVs ( $n = 12$ ) measured with nanoparticle tracking analysis (Nanosight

760 NS300). The red line connects the mean concentration of the two groups and demonstrates a

761 38% increase in Tobi-OMVs concentration compared to ctrl-OMVs concentration. Data are

762 shown as the means  $\pm$  SEM **(D)** Primary CF-HBECs from three donors ( $n = 3$ ) were polarized in

763 ALI culture before being exposed to either the same number of ctrl-OMVs or Tobi-OMVs or 40%

764 more Tobi-OMVs (1.4X Tobi-OMVs) for 6 hours. The basolateral medium was collected to

765 measure IL-8. Lines connect experiments conducted with CF-HBECs from the same donor.

766 Horizontal red lines and red dots indicate means  $\pm$  SEM. Paired t-tests **(C)**; Linear mixed-effects

767 models with CF-HBEC donor as a random effect were used to calculate  $P$  values **(D)**; \* $P < 0.05$ ;

768 \*\* $P < 0.01$ ; \*\*\* $P < 0.001$ .

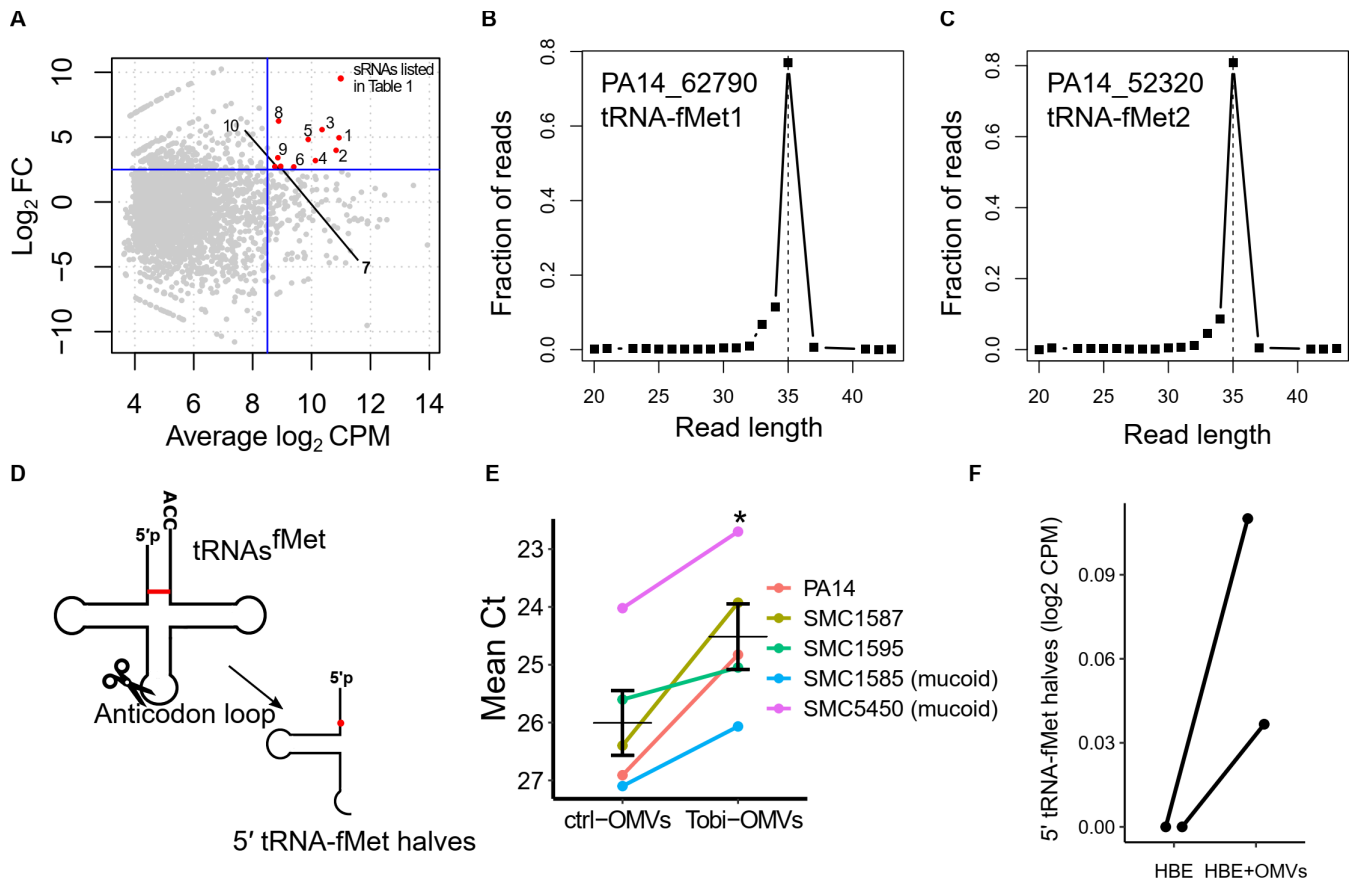

769 **Figure. 2 Tobramycin increases the abundance of 5' tRNA-fMet halves in OMVs, and the**  
 770 **tRNA halves are transferred into host cells. (A)** MA plot comparing the small RNA  
 771 expression profile in Tobi-OMVs and ctrl-OMVs ( $n = 3$  for each group). Each dot represents a  
 772 unique sequence read. The most abundant and most induced PA14 sRNAs by tobramycin treatment  
 773 are highlighted in red and listed in Table 1. **(B and C)** Length distribution of Tobi-OMVs sRNAs  
 774 mapped to gene locus PA14\_62790 **(B)** and PA14\_52320 **(C)**. **(D)** Secondary cloverleaf  
 775 structure of tRNA<sup>fMet</sup> and cleavage site in the anticodon loop to generate 5' tRNA-fMet halves.  
 776 The red line indicates the only different pair of nucleotides between the two tRNA<sup>fMet</sup>, and the  
 777 red dot represents the only nucleotide difference between the two 5' tRNA-fMet halves. **(E)**  
 778 qPCR for 5' tRNA-fMet halves in ctrl-OMVs and Tobi-OMVs purified from PA14 and four clinical  
 779 isolates ( $n = 5$  strains), including two mucooid and two non-mucooid strains. The qPCR primers  
 780 and probe were designed to detect both 5' tRNA-fMet halves. Horizontal lines indicate means  $\pm$   
 781 SEM. A paired t-test was used to establish significance. \*  $P < 0.05$ . **(F)** Both 5' tRNA-fMet  
 782 halves were detected in polarized primary HBE cells exposed to ctrl-OMVs but not in unexposed  
 783 cells using small RNA sequencing (from two donors;  $n = 2$ ). Sequence reads in **(F)** are from our  
 784 previously published dataset (22).

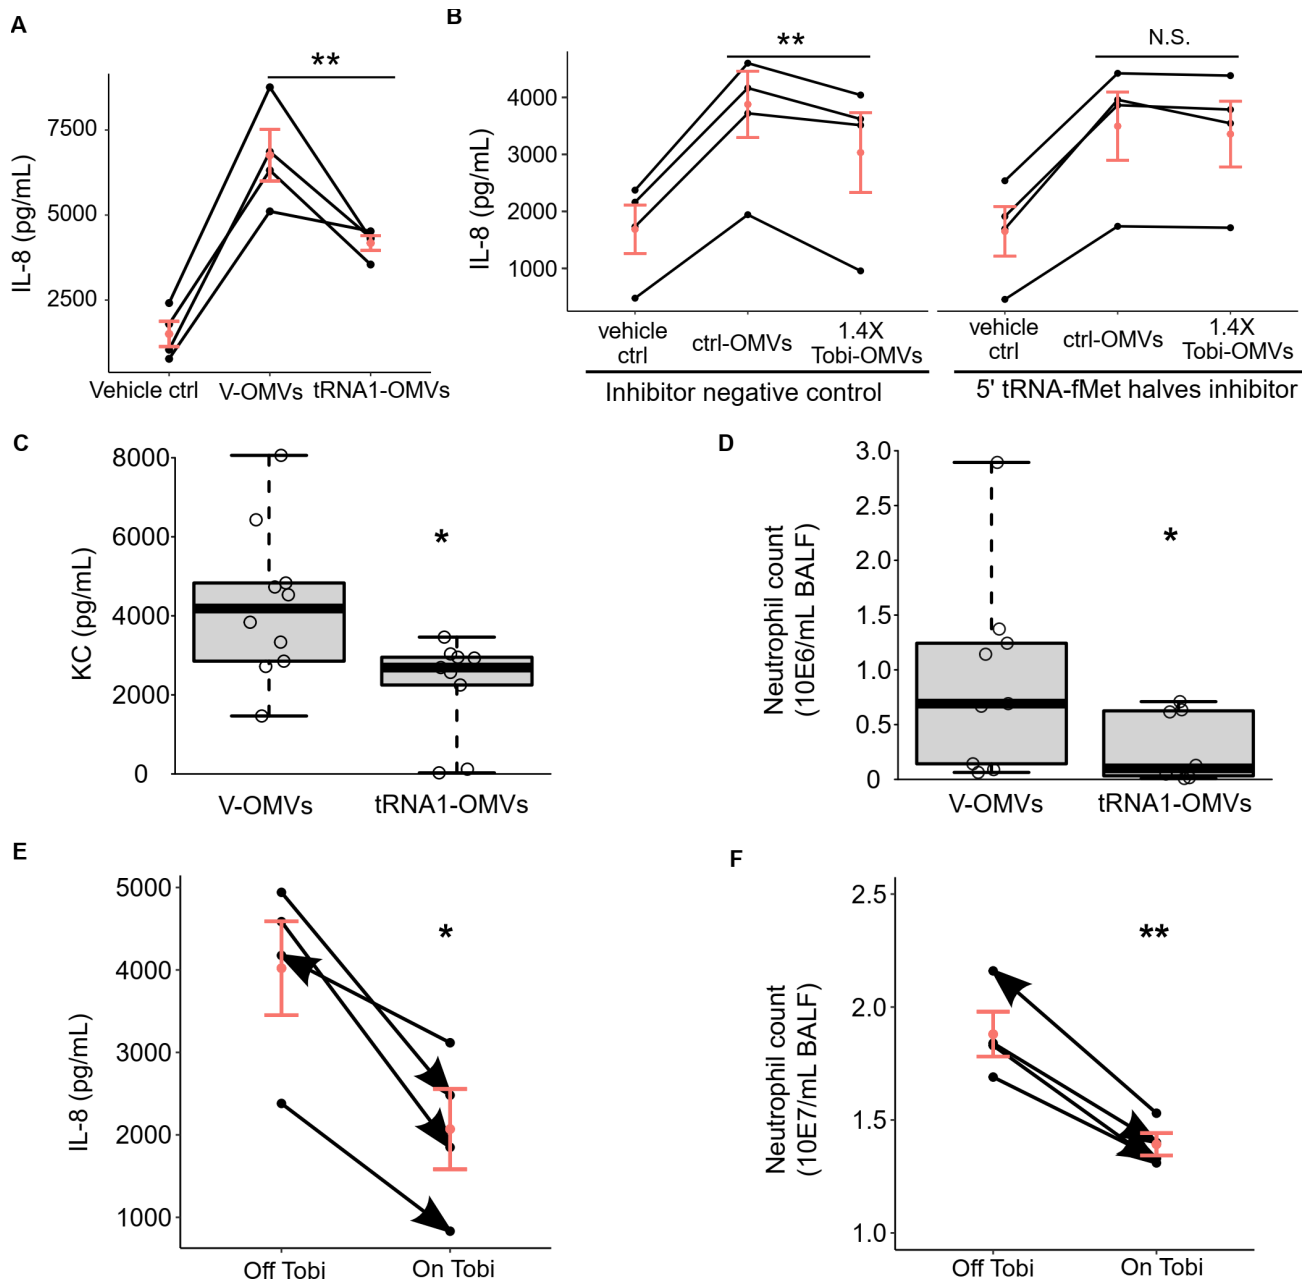

785 **Figure 3. 5' tRNA-fMet halves reduce IL-8 secretion *in vitro* and *in vivo*.** (A) Polarized CF-  
 786 HBECs ( $n = 4$ ) exposed to tRNA1-OMV secreted less IL-8 compared to cells exposed to V-  
 787 OMV. (B) The Tobi-OMV effect of reducing IL-8 secretion was abolished by transfection of an  
 788 antisense RNA oligo inhibitor that anneals to both 5' tRNA-fMet halves (5' tRNA-fMet halves  
 789 inhibitor) but not by transfection of a negative control inhibitor ( $n = 4$ ). Lines in panels A and B  
 790 connect data points using the cells from the same donor, a biological replicate. A linear mixed-  
 791 effects model with CF-HBEC donor as a random effect was used to calculate  $P$  values. (C and

792 **D)** BALF from mice exposed to V-OMVs or tRNA1-OMVs was collected to measure KC  
793 concentration (**C**) and neutrophil number (**D**). Minimum-to-maximum whisker and box plots  
794 showing the median and interquartile ranges. 9 to 10 mice were used per group, and Wilcoxon  
795 rank-sum tests were used to test significance. (**E** and **F**) BALF samples collected from four CF  
796 subjects ( $n= 4$ ) during the 4-week administration of inhaled tobramycin (On Tobi) or not (Off  
797 Tobi) with BALF IL-8 levels in panel (**E**) and BALF neutrophil content in panel (**F**). Lines connect  
798 data points from the same subject, and the arrowheads indicate the sample collection order for  
799 each CF subject. Linear mixed-effect models were used to account for donor-to-donor variability  
800 and the number of days between collection dates for each sample pair (Supplemental Table 1).  
801 Horizontal red lines and red dots indicate means  $\pm$  SEM; N.S., not significant; \* $P < 0.05$ ; \*\* $P <$   
802 0.001.

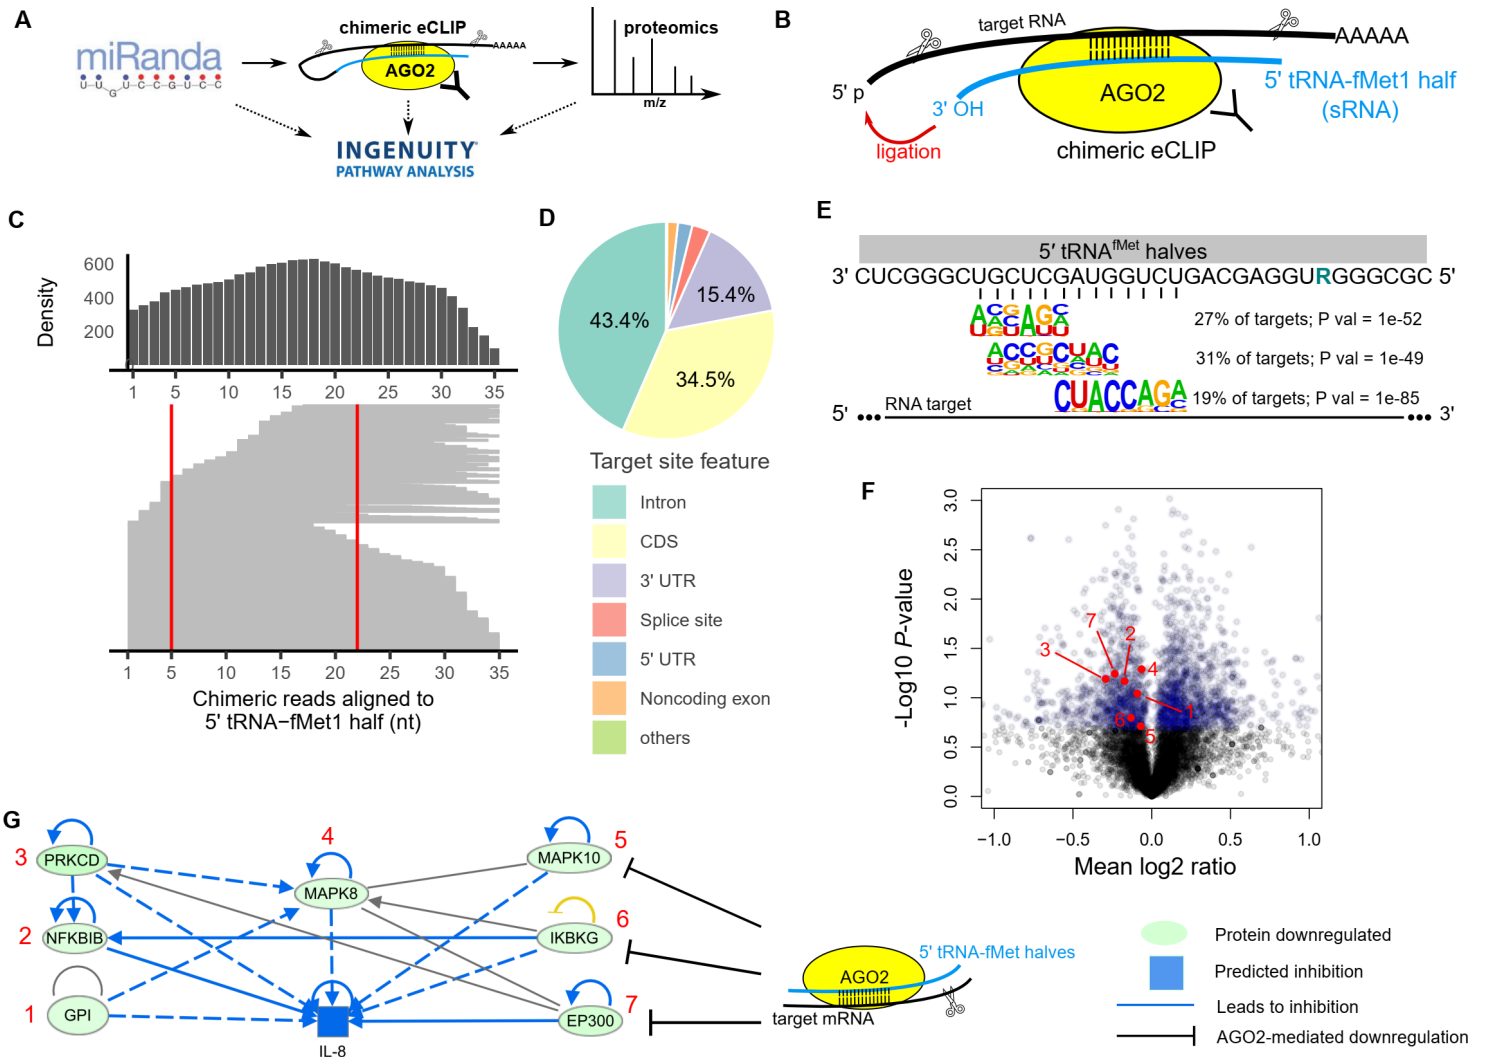

803 **Figure 4. 5' tRNA-fMet halves downregulate protein expression in a sequence-specific**

804 **manner mediated by AGO2. (A)** Schematic representation of the three-step approach to

805 identify targets of 5' tRNA-fMet halves leading to differential protein expression. **(B)** Diagram of

806 chimeric eCLIP to identify RNAs pulled down with AGO2. Samples were treated with RNase I

807 for RNA fragmentation followed by immunoprecipitation of AGO2-mRNA-sRNA complexes

808 before mRNA-sRNA ligation to generate chimeric reads. **(C)** Alignment of chimeric reads to the

809 5' tRNA-fMet1 half sequence and the count distribution of each nucleotide (top density plot).

810 Chimeric reads were identified in tRNA-fMet1 half-transfected CF-HBECs (one donor;  $n = 1$ )

811 and contained at least 18-nt long 5' tRNA-fMet1 half subsequences. The red lines indicate the

812 region where the primer performs targeted chimeric eCLIP anneals. **(D)** Distribution of target



813 site features identified with the targeted chimeric eCLIP. **(E)** Sequence logos of most significant  
814 enriched target RNA motifs and the complementary sequence of 5' tRNA-fMet halves. R  
815 denotes a purine nucleotide (G/A). **(F)** Volcano plot of proteomic analysis of polarized CF-  
816 HBECs (three donors;  $n = 3$ ) treated with tRNA1-OMVs compared to cells treated with V-OMVs.  
817 The top 20% differentially expressed proteins, determined by paired t-tests, are colored in blue.  
818 Red dots with numbers represent down-regulated proteins corresponding to proteins numbered  
819 in panel (G). **(G)** IPA identified a down-regulated pro-inflammatory network in the five  
820 consensus pathways (table 2), leading to decreased IL-8 expression. mRNA transcripts  
821 encoding MAPK10, IKBKG, and EP300 were identified as binding targets of tRNA-fMet1 half in  
822 the targeted chimeric eCLIP experiment.

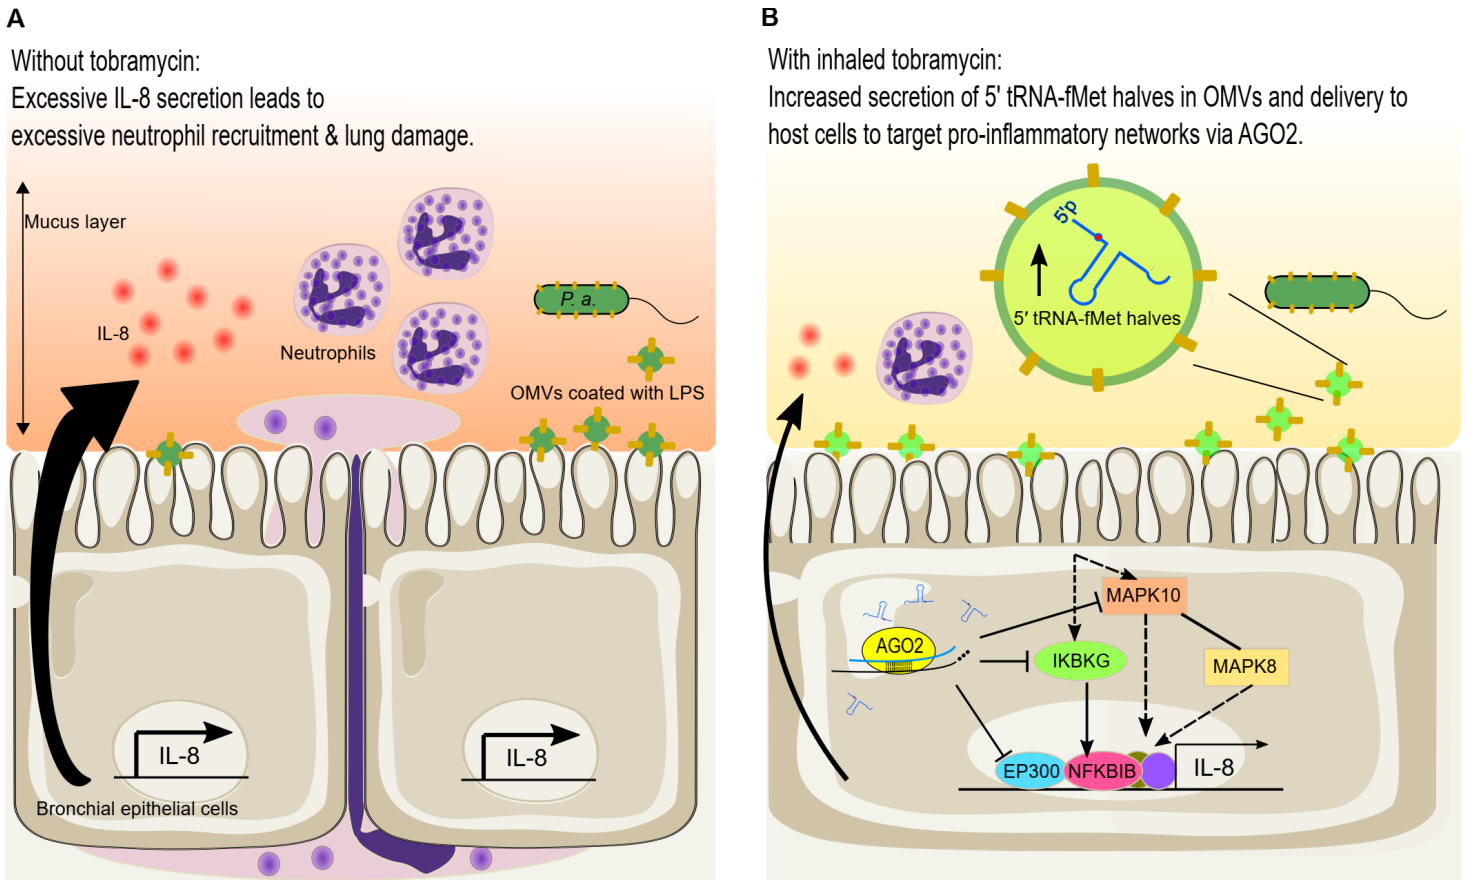

823 **Figure 5. Graphical abstract indicating the anti-inflammatory effect of tobramycin**

824 **mediated by 5' tRNA-fMet halves in *P. aeruginosa* OMVs. (A) *P. aeruginosa* colonizes the**

825 CF lungs and secretes OMVs. OMVs diffuse through the mucus layer overlying bronchial

826 epithelial cells and induce IL-8 secretion, which recruits excessive neutrophils and causes lung

827 damage. (B) Tobramycin increases 5' tRNA-fMet halves in OMVs secreted by *P. aeruginosa*. 5'

828 tRNA-fMet halves are delivered into host cells and loaded into the AGO2 protein complex to

829 down-regulate protein expression of MAPK10, IKBKG, and EP300, which suppresses OMV-

830 induced IL-8 secretion and neutrophil recruitment. A reduction in neutrophils in BALF is

831 predicted to improve lung function and decrease lung damage.

832 **Tables**

833 **Table 1. Top 10 most abundant and most differentially induced sRNAs in Tobi-OMVs**

834 **compared to ctrl-OMVs**

| #  | PA14 locus | Gene product of the locus | Log2FC | Average Log2CPM | length                   | Minimum free energy (kcal/mol) <sup>A</sup> |
|----|------------|---------------------------|--------|-----------------|--------------------------|---------------------------------------------|
| 1  | Multiple   | tRNA-Asp                  | 4.95   | 10.93           | 23 (20, 23) <sup>B</sup> | -0.2                                        |
| 2  | Multiple   | 16S rRNA                  | 3.98   | 10.83           | 33 (30-39) <sup>B</sup>  | -6.9                                        |
| 3  | Multiple   | 23S rRNA                  | 5.57   | 10.35           | 44                       | -14.6                                       |
| 4  | Multiple   | tRNA-Ala                  | 3.19   | 10.13           | 34                       | -8                                          |
| 5  | 62790      | tRNA-fMet1                | 4.82   | 9.88            | 35                       | -7.5                                        |
| 6  | 28740      | tRNA-Pro                  | 2.70   | 9.39            | 36                       | -9.7                                        |
| 7  | 52320      | tRNA-fMet2                | 2.74   | 8.95            | 35                       | -9.3                                        |
| 8  | 61760      | tRNA-Gln                  | 6.23   | 8.88            | 20                       | -0.2                                        |
| 9  | 30720      | tRNA-Cys                  | 3.41   | 8.85            | 40                       | -4.6                                        |
| 10 | multiple   | 5S rRNA                   | 2.72   | 8.75            | 45                       | -3.8                                        |

835 <sup>A</sup>The minimum free energy for each sRNA was predicted using the RNAfold web server (84)

836 <sup>B</sup>Multiple reads of different lengths were mapped to the same locus, and the most abundant

837 read is listed in Table 1 and Figure 2A.

838 **Table 2. The consensus of significantly enriched signaling pathways identified using**  
 839 **three approaches<sup>A</sup>.**

| Canonical pathway                             | Gene target prediction      |                      | Gene target validation             |                      | Protein expression             |                      |
|-----------------------------------------------|-----------------------------|----------------------|------------------------------------|----------------------|--------------------------------|----------------------|
|                                               | <i>P</i> value              | z-score <sup>C</sup> | <i>P</i> value                     | z-score <sup>C</sup> | <i>P</i> value                 | z-score <sup>C</sup> |
|                                               | miRanda (1518) <sup>B</sup> |                      | chimeric eCLIP (1936) <sup>B</sup> |                      | Proteomics (2168) <sup>B</sup> |                      |
| <b>Integrin-linked kinase (ILK) Signaling</b> | 0.0005                      | -3.26                | 0.0041                             | -0.53                | 1.1E-08                        | -2.27                |
| <b>LPS-stimulated MAPK Signaling</b>          | 0.0087                      | -3.46                | 0.0005                             | -3.60                | 7.7E-05                        | -0.68                |
| <b>HIF1a Signaling</b>                        | 0.0022                      | -3                   | 0.0072                             | -4.35                | 0.0015                         | -0.87                |
| <b>IL-17A Signaling in Airway Cells</b>       | 0.0011                      | -2.53                | 0.0085                             | -1.66                | 0.0077                         | -0.30                |
| <b>IL-6 Signaling</b>                         | 0.0002                      | -4.02                | 0.0389                             | -3.46                | 0.0141                         | -0.94                |

840 <sup>A</sup> There are 38 consensus pathways. Only consensus pathways predicted to downregulate IL-8  
 841 secretion in epithelial cells by IPA are listed.

842 <sup>B</sup> Number in parentheses indicates the number of genes/proteins used to perform pathway  
 843 enrichment analysis.

844 <sup>C</sup> Negative z-scores indicate that the pathways are predicted to be down-regulated.
